# Supplementary material for: A Transposable Element within the Non-canonical Telomerase RNA of Arabidopsis thaliana Modulates Telomerase in Response to DNA Damage
Source: PubMed Central journal article supplement (PMC4468102; doi:10.1371/journal.pgen.1005281), 2015-06-15
Supplement: pgen.1005281.s001.pdf [file pgen.1005281.s001.pdf]

| <b>Accession</b> | <b>Predicted DRE status</b> | <b>Genotyped DRE status</b> |
|------------------|-----------------------------|-----------------------------|
| <b>Col-0</b>     | Full                        | Full                        |
| <b>Ler-0</b>     | None                        | None                        |
| <b>Aa_0</b>      | Partial                     | None                        |
| <b>Ang_0</b>     | Partial                     | None                        |
| <b>Co_1</b>      | Partial                     | None                        |
| <b>Ei_2</b>      | Partial                     | None                        |
| <b>Gu_0</b>      | Partial                     | None                        |
| <b>Je_0</b>      | Partial                     | None                        |
| <b>Jl_3</b>      | Partial                     | None                        |
| <b>Knox_18</b>   | Partial                     | None                        |
| <b>Ra_0</b>      | Partial                     | None                        |
| <b>Ber</b>       | Full                        | Full                        |
| <b>Bik_1</b>     | Full                        | Full                        |
| <b>Krot_0</b>    | Full                        | Full                        |
| <b>Nc_1</b>      | Full                        | Full                        |
| <b>Nok_3</b>     | Full                        | Full                        |
| <b>Qar_8a</b>    | Full                        | Full                        |
| <b>Ws_2</b>      | Full                        | Full                        |

Supplemental Table 1
