# Supplementary material for: A Transposable Element within the Non-canonical Telomerase RNA of Arabidopsis thaliana Modulates Telomerase in Response to DNA Damage
Source: PubMed Central journal article supplement (PMC4468102; doi:10.1371/journal.pgen.1005281), 2015-06-15
Supplement: pgen.1005281.s006.pdf [file pgen.1005281.s006.pdf]

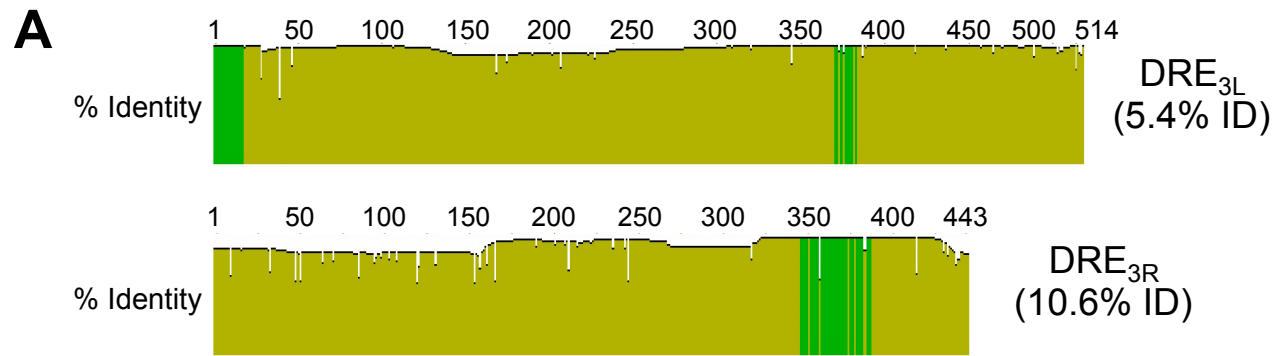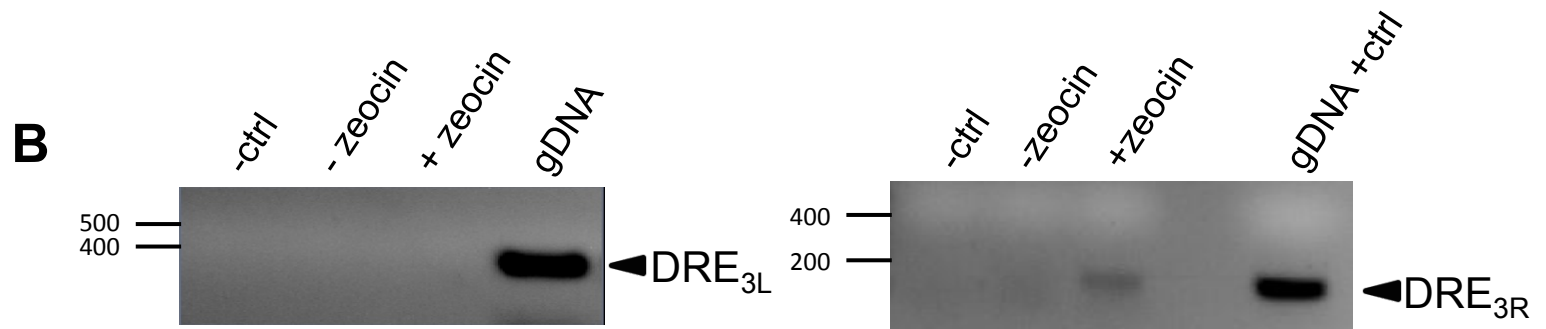

Supplemental Figure 5
