# Supplementary material for: A Transposable Element within the Non-canonical Telomerase RNA of Arabidopsis thaliana Modulates Telomerase in Response to DNA Damage
Source: PubMed Central journal article supplement (PMC4468102; doi:10.1371/journal.pgen.1005281), 2015-06-15
Supplement: pgen.1005281.s012.pdf [file pgen.1005281.s012.pdf]

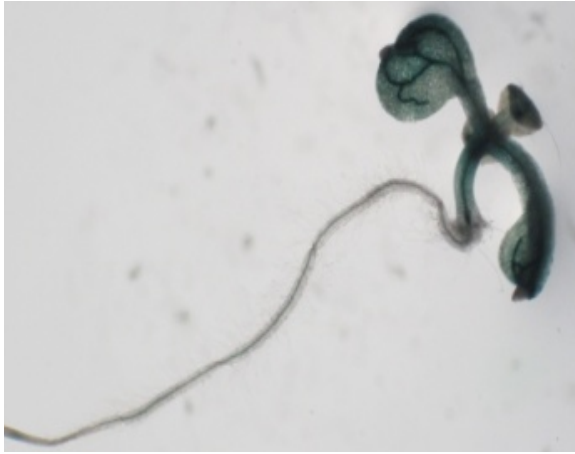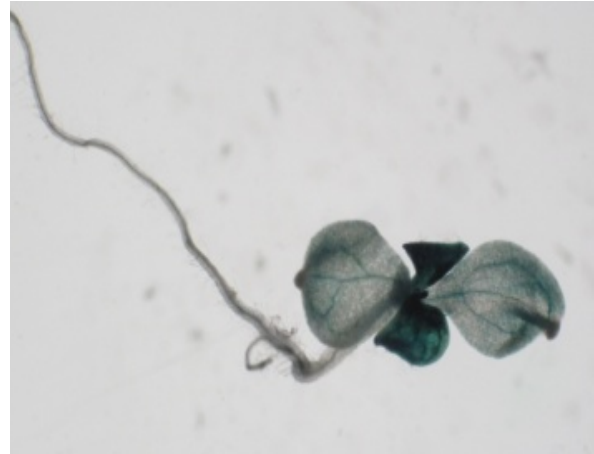

- zeocin

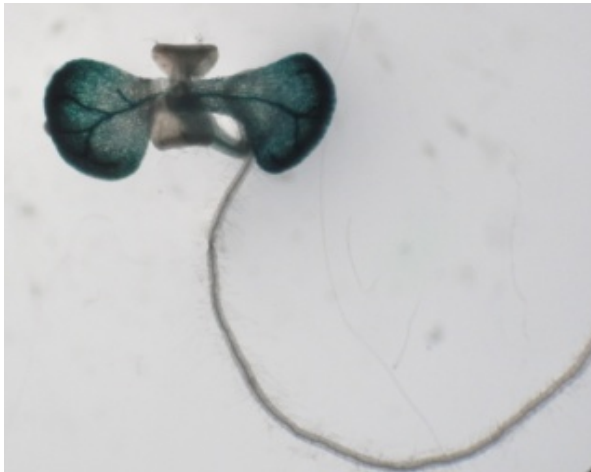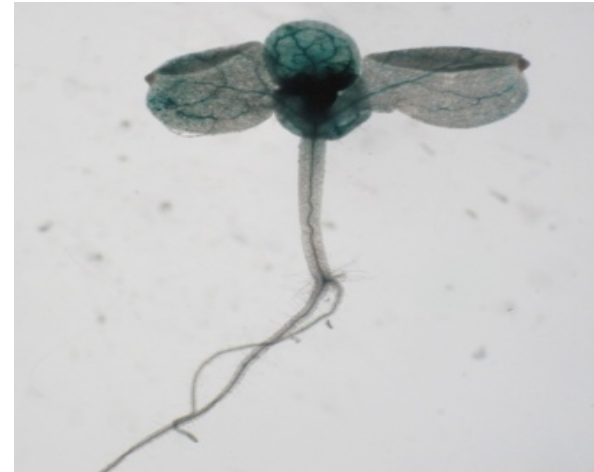

+ zeocin

TER2::GUS in Col-0

TER2::GUS in Ler-0
